# Supplementary material for: Interaction of Phytophthora sojae Effector Avr1b With E3 Ubiquitin Ligase GmPUB1 Is Required for Recognition by Soybeans Carrying Phytophthora Resistance Rps1-b and Rps1-k Genes
Source: Front Plant Sci. 2021 Oct 6;12:725571. doi: 10.3389/fpls.2021.725571 (PMC8526854; doi:10.3389/fpls.2021.725571)
Supplement: Supplementary Table 1 — Primers used for cloning soybean GmPUB genes and P. sojae effector genes into pLAW10 and pLAW11 plasmids (Spreadsheet). [file Table_1.xlsx]

## Sheet: Sheet1
Table S1 Primers used for cloning soybean GmPUB genes and P. sojae effector genes into pLAW10 and pLAW11.
Gene	Direction	Name	Sequence (5' - 3')
GmPUB1-1	F	PUB1-1-GW1.For	ATGCACAAGTTTGTACAAAAAAGCAGGCTCCATGGATGAAATTGAAATCCCTGCT
	R	PUB1-GW1.Rev	GCATACCACTTTGTACAAGAAAGCTGGGTTCATGGATAGGAAGATAACAAAGGT
GmPUB1-2	F	PUB1-2-GW1.For	ATGCACAAGTTTGTACAAAAAAGCAGGCTCCATGGACGAAATTGAAATCCCTGCC
	R	PUB1-GW1.Rev	GCATACCACTTTGTACAAGAAAGCTGGGTTCATGGATAGGAAGATAACAAAGGT
GmPUB2-1	F	PUB2-GW1.For	ATGCACAAGTTTGTACAAAAAAGCAGGCTCCATGGTTTTGTCTTGGTCAAGAAGG
	R	PUB2-GW1.Rev	GCATACCACTTTGTACAAGAAAGCTGGGTTTAAAATGGCTTCTTAAGATGCTCG
GmPUB3-1	F	PUB3-GW1.For	ATGCACAAGTTTGTACAAAAAAGCAGGCTCCATGAACGAAATCGATGTTCCTTCG
	R	PUB3-GW1.Rev	GCATACCACTTTGTACAAGAAAGCTGGGTTCACACATAATTCGGGTATGAATTAAGC
GmPUB4-1	F	PUB4-GW1.For	ATGCACAAGTTTGTACAAAAAAGCAGGCTCCATGACAGAAATTGAAATTCCTCAGTTTT
	R	PUB4-GW1.Rev	GCATACCACTTTGTACAAGAAAGCTGGGTTCACCTATGGAATCTGGTTAACAAAT
GmPUB5-1	F	PUB5-GW1.For	ATGCACAAGTTTGTACAAAAAAGCAGGCTCCATGGTTTTGTCATGGACAAAAGGG
	R	PUB5-GW1.Rev	GCATACCACTTTGTACAAGAAAGCTGGGTTTAGAAGGGCTTCTTCAAATGCTTG
AtPUB22	F	PUB22-GW1.For	ATGCACAAGTTTGTACAAAAAAGCAGGCTCCATGGATCAAGAGATAGAGATTCCT
	R	PUB22-GW1.Rev	GCATACCACTTTGTACAAGAAAGCTGGGTTCAAGCAGGATACGAATCATACAAA
AtPUB23	F	PUB23-GW1.For	ATGCACAAGTTTGTACAAAAAAGCAGGCTCCATGTCCGGAGGAATAATGGATGAA
	R	PUB23-GW1.Rev	GCATACCACTTTGTACAAGAAAGCTGGGTTCAGCAGGGATATGCAAGAATCATG
AtPUB24	F	PUB24-GW1.For	ATGCACAAGTTTGTACAAAAAAGCAGGCTCCATGGATCAAGAAGAGGAAGAGATC
	R	PUB24-GW1.Rev	GCATACCACTTTGTACAAGAAAGCTGGGTTTAGATCTTTGGCCCTTTGGGTGAG
Avr1b (P6954, P6497, P7076, mutants)	F	Avr1bR1-GW1nosig.For	ATGCACAAGTTTGTACAAAAAAGCAGGCTCCACTGAGTACTCCGACGAAACCAAT
	R	Avr1bR1-GW1.Rev	GCATACCACTTTGTACAAGAAAGCTGGGTTCAGCTCTGATACAGGTGAAAGGTG
Avr1b (P7063, P7064)	F	Avr1bR1-GW1nosig.For	ATGCACAAGTTTGTACAAAAAAGCAGGCTCCACTGAGTACTCCGACGAAACCAAT
	R	Avr1bR7-GW1.Rev	GCATACCACTTTGTACAAGAAAGCTGGGTTCAGCTCTGATACCGGTGAAAGGTG
Avr1b (P7074)	F	Avr1bR1-GW1nosig.For	ATGCACAAGTTTGTACAAAAAAGCAGGCTCCACTGAGTACTCCGACGAAACCAAT
	R	Avr1bR17-GW1.Rev	GCATACCACTTTGTACAAGAAAGCTGGGTTCAGTTCTGATACAGGTGAAAGGTG
Avr1a	F	Avr1a-GW1nosig.For	ATGCACAAGTTTGTACAAAAAAGCAGGCTCCATGGCAGCAACTGATGCCGACCAG
	R	Avr1a-GW1.Rev	GCATACCACTTTGTACAAGAAAGCTGGGTCTAATGACCTCTCAAGTGGAATACA
Avr1d	F	Avr1d-GW1nosig.For	ATGCACAAGTTTGTACAAAAAAGCAGGCTCCATGGTATCGAAGGCCGACGAGACTGGC
	R	Avr1d-GW1.Rev	GCATACCACTTTGTACAAGAAAGCTGGGTCTAATTCATGCGGTAGTGGATTTTG
Avr1k	F	Avr1k-GW1nosig.For	ATGCACAAGTTTGTACAAAAAAGCAGGCTCCCTCACTTGCGCCACCTCCGAGCAA
	R	Avr1k-GW1.Rev	GCATACCACTTTGTACAAGAAAGCTGGGTTCAGATAATCATGATGCTGTTCAGA
Avr3a	F	Avr3a-GW1nosig.For	ATGCACAAGTTTGTACAAAAAAGCAGGCTCCATGCTTTCGACCACGAACGCAAACCAG
	R	Avr3a-GW1.Rev	GCATACCACTTTGTACAAGAAAGCTGGGTCTACGCGTTTTTCGCTGCTGCCTTT
Avr4/6	F	Avr46-GW1nosig.For	ATGCACAAGTTTGTACAAAAAAGCAGGCTCCATCACAGATGAGTCTCAGCCCCG
	R	Avr46-GW1.Rev	GCATACCACTTTGTACAAGAAAGCTGGGTTTACGTTAGGTGGTGTAGTCCGACG
PiAvr3a	F	PiAvh3a-GW1nosig.For	ATGCACAAGTTTGTACAAAAAAGCAGGCTCCATGATCGACCAAACCAAGGTCCTGGTG
	R	PiAvh3a-GW1.Rev	GCATACCACTTTGTACAAGAAAGCTGGGTCTAATATCCAGTGAGCCCCAGGTGCATC
Avh5	F	Avh5-GW1nosig.For	ATGCACAAGTTTGTACAAAAAAGCAGGCTCCACAAGAGTCCCCGACGATGCCAAT
	R	Avh5-GW1.Rev	GCATACCACTTTGTACAAGAAAGCTGGGTTCACTTGGCCTCTTGCGATCGCCG
Avh25	F	Avh25-GW2nosig.For *	CCAGGAGGCCACCATGGCCCAGTCGACGGCAAGCGAGGCGGCG
	R	Avh25-GW2.Rev *	GCATACCACTTTGTACAAGAAAGCTGGGTTCGTGTGCCAGTGGCCCACCTCCAG
Avh29	F	Avh29-GW2nosig.For *	CCAGGAGGCCACCATGGCCGCCGTCGCGGGTGCCAGCGA
	R	Avh29-GW2.Rev *	GCATACCACTTTGTACAAGAAAGCTGGGTATGGAAATTATTGATGAGCCAGTTG
Avh42	F	Avh42-GW2nosig.For *	CCAGGAGGCCACCATGGCCTTGAGTATCACCAATTCCGACAAG
	R	Avh42-GW2.Rev *	GCATACCACTTTGTACAAGAAAGCTGGGTCTTTTTTGGGATCGACGAGACCCAA
Avh73	F	PsAvh73-GW1nosig.For	ATGCACAAGTTTGTACAAAAAAGCAGGCTCCATGGCTTCTGCTTCTTCAGAGCTCG
	R	PsAvh73-GW1.Rev	GCATACCACTTTGTACAAGAAAGCTGGGTCTAGGCGGCTTTGCCTTCGAGGACC
Avh80	F	Avh80-GW2nosig.For *	CCAGGAGGCCACCATGGCCACTTCGGCGACAGCACTCTCCAAT
	R	Avh80-GW2.Rev *	GCATACCACTTTGTACAAGAAAGCTGGGTACCCTTGGCAGTAATACCCGCCACT
Avh163	F	Avh163-GW1nosig.For	ATGCACAAGTTTGTACAAAAAAGCAGGCTCCATGGCTACCGTATCAGCACTCCAGCTC
	R	Avh163-GW1.Rev	GCATACCACTTTGTACAAGAAAGCTGGGTCTAAGAGCGCCGAGGGGTCACATTTGTG
Avh288	F	Avh288-GW2nosig.For *	CCAGGAGGCCACCATGGCCGAAAAGACCACCACAGCTCGCCGC
	R	Avh288-GW2.Rev *	GCATACCACTTTGTACAAGAAAGCTGGGTAGAAACCATCGAGTTGAAGCCGGCG
General Gateway forward	F	AvhGW3.For	ACAAGTTTGTACAAAAAAGCAGGCTCCCAGGAGGCCACCATGGCC
General Gateway reverse	R	AvhGW3.Rev	GCATACCACTTTGTACAAGAAAGCTGGGT
* Amplification with these primers was followed by re-amplification with the AvhGW3.For and AvhGW3.Rev primers to complete the addition of the AttB site to the amplified fragment
